# Supplementary material for: Large-scale MoS2 thin films with a chemically formed holey structure for enhanced Seebeck thermopower and their anisotropic properties
Source: Royal Society of Chemistry journal article supplement (doi:10.1039/d0ta02629h), 2020-01-01
Supplement: d0ta02629h1.pdf [file d0ta02629h1.pdf]

*Supplementary information for*

**Large-scale MoS<sub>2</sub> thin films with chemically formed holey structure for enhanced Seebeck thermopower and their anisotropic properties**

**Min-Sung Kang<sup>a,\*</sup>, Soo-Young Kang<sup>a,\*</sup>, Won-Yong Lee<sup>a,\*</sup>, No-Won Park<sup>a</sup>, Ki Chang Kwon<sup>b</sup>, Seokhoon Choi<sup>b</sup>, Gil-Sung Kim<sup>a</sup>, Jungtae Nam<sup>c,d</sup>, Keun Soo Kim<sup>c</sup>, Eiji Saitoh<sup>e,f,g</sup>, Ho Won Jang<sup>b</sup>, and Sang-Kwon Lee<sup>a,e\*\*</sup>**

<sup>a</sup> Department of Physics, Chung-Ang University, Seoul 06974, Republic of Korea

<sup>b</sup> Department of Materials Science and Engineering, Seoul National University, Seoul 08826, Republic of Korea

<sup>c</sup> Department of Physics and Astronomy, Sejong University, Seoul 05006, Republic of Korea

<sup>d</sup> Institute of Advanced Composite Materials, Korea Institute of Science and Technology, Wanju 55324, Republic of Korea

<sup>e</sup> Institute for Materials Research, Tohoku University, Sendai 980-8577, Japan

<sup>f</sup> WPI Advanced Institute for Materials Research, Tohoku University, Sendai 980-8577, Japan

<sup>g</sup> Department of Applied Physics, The University of Tokyo, Tokyo 113-8656, Japan

\* These authors contributed equally to this work

\*\* Address correspondence to [sangkwonlee@cau.ac.kr](mailto:sangkwonlee@cau.ac.kr)

## **1. CVD-grown TMDC films transfer method (PMMA-assisted wet transfer)**

In general, it is very difficult to transfer CVD-grown TMDC material such as MoS<sub>2</sub>, WSe<sub>2</sub>, and WS<sub>2</sub> onto bare SiO<sub>2</sub>/Si substrate without etching the bottom SiO<sub>x</sub> layer. Therefore, we used the conventional PMMA-assisted wet chemical etching method. First, a thin layer of PMMA (950 K A4) was spin-coated on the CVD-grown MoS<sub>2</sub> film, and the sample was placed on a hot plate at 120 °C for 2 min. The sample was then floated in 5% HF (aq) for 1 min, in which the Si substrate sank owing to etching of SiO<sub>x</sub>, which left the PMMA/MoS<sub>2</sub> layers to float on top of the HF solution. Then, the PMMA-coated MoS<sub>2</sub> film was washed with de-ionized water, transferred to target substrates such as SiO<sub>2</sub>/Si and Cu/SiO<sub>2</sub>/Si layers depending on the in-plane and cross-plane Seebeck coefficient measurements, and dried in ambient conditions for 1 h. For good adhesion to the substrate, further baking was performed at 120 °C for 2 min. Finally, the PMMA layer was removed using warm acetone, followed by rinsing with isopropyl alcohol. The transferred sample was loaded into a furnace to anneal at 250 °C for 2 h to further remove polymer residue. For the Seebeck coefficient measurements of the samples, additional Cu metal layers were deposited on the transferred MoS<sub>2</sub>/SiO<sub>2</sub>/Si and MoS<sub>2</sub>/Cu/SiO<sub>2</sub>/Si substrates by radio-frequency sputtering at room temperature. The same method was used for WSe<sub>2</sub> and WS<sub>2</sub> films.

## 2. AFM measurement of WSe<sub>2</sub> and WS<sub>2</sub> thin films

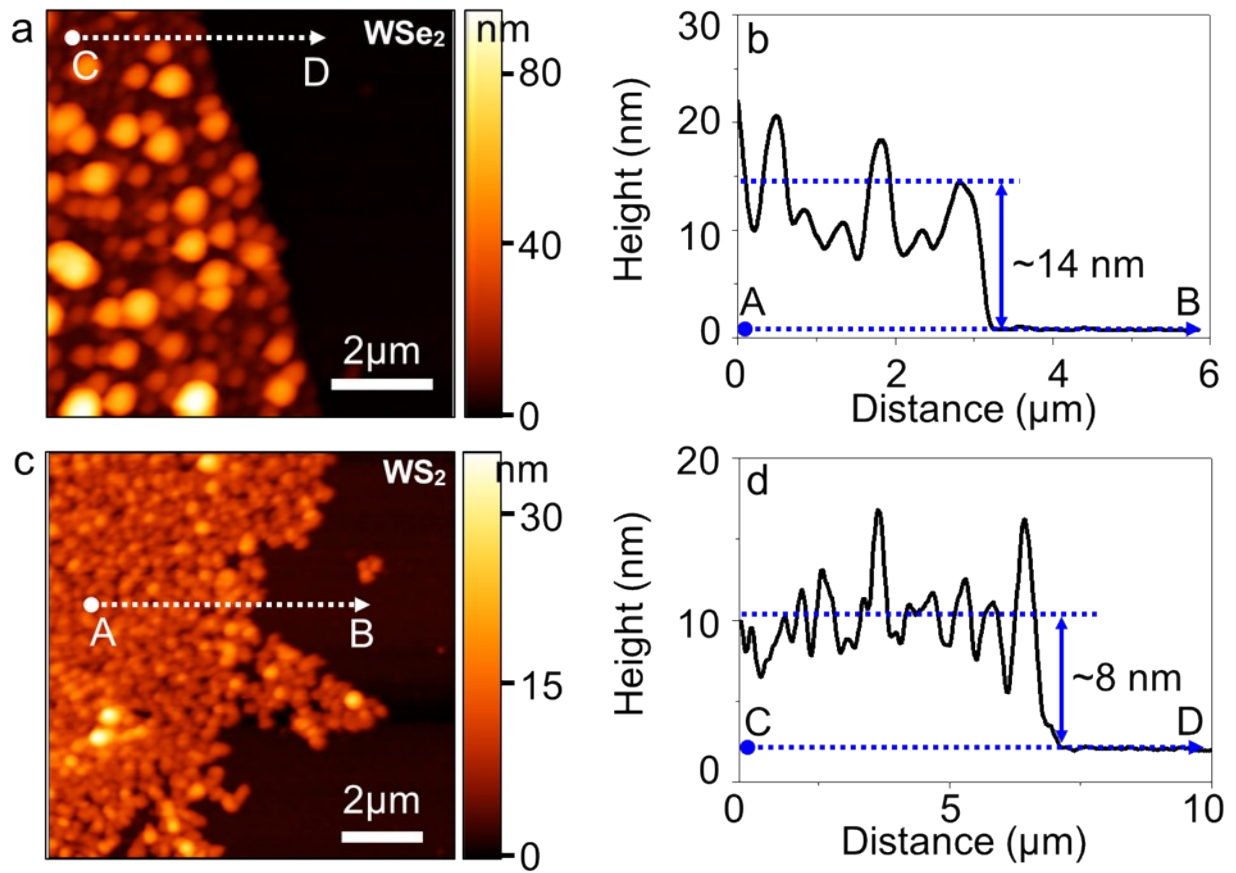

**Fig. S1.** (a) and (c) AFM mapping images of WSe<sub>2</sub> and WS<sub>2</sub> thin films. (b) and (d) Corresponding AFM height profiles (white lines, A–B and C–D) in (a) and (c). The average thicknesses of the WSe<sub>2</sub> and WS<sub>2</sub> thin films were ~14 and ~8 nm, respectively.

### 3. Power factors for CVD-grown TMDC films

Fig. S2a shows the in- and cross-plane power factors ( $PF = S^2\sigma$ ) of CVD-grown MoS<sub>2</sub> films at

300 K with an anisotropic ratio  $\left(\frac{PF_{\parallel}}{PF_{\perp}}\right)$  of the power factor. The  $PF_{\parallel}$  and  $PF_{\perp}$  of the MoS<sub>2</sub> films were determined to be  $\sim 432.6$  and  $\sim 1.8 \times 10^{-6} \mu\text{W}/\text{m}\cdot\text{K}^2$ , respectively, with an extremely large anisotropic ratio of  $\sim 2.4 \times 10^8$  at 300 K. Fig. S2b shows the cross-plane power factors ( $PF_{\perp}$ ) of MoS<sub>2</sub>, WSe<sub>2</sub>, and WS<sub>2</sub> films at 300 K measured as  $\sim 1.8 \times 10^{-6}$ ,  $\sim 2.8 \times 10^{-7}$ , and  $\sim 1.9 \times 10^{-7} \mu\text{W}/\text{m}\cdot\text{K}^2$ .

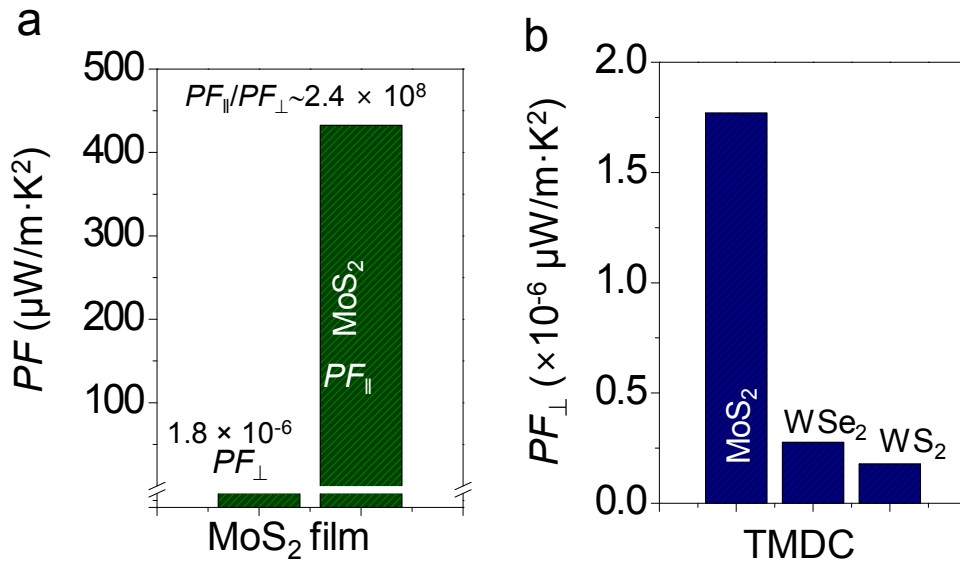

**Fig. S2.** (a) In- and cross-plane power factors ( $PF_{\parallel}$  and  $PF_{\perp}$ ) of CVD-grown MoS<sub>2</sub> films with power factor anisotropy. (b) Cross-plane  $PF_{\perp}$  of MoS<sub>2</sub>, WSe<sub>2</sub>, and WS<sub>2</sub> films at 300 K.

#### 4. Thermoelectric characteristics of various TMDC materials from literatures

**Table S1.** The comparison of thermoelectric performance of MoS<sub>2</sub> in our work with the thermoelectric performances of TMDCs reported in previous literatures

| Materials                         | Thickness    | $\sigma_{\parallel}$ [S/m] | $\sigma_{\perp}$ (S/m)  | S  [uV/K] @ 300 K         | Ref         |
|-----------------------------------|--------------|----------------------------|-------------------------|---------------------------|-------------|
| MoS <sub>2</sub>                  | 1 – 2 layers | -                          | -                       | 420 ~ 1 x 10 <sup>5</sup> | [S1 – S3]   |
| MoS <sub>2</sub>                  | Thin film    | 17~28.3                    | -                       | 80~ 93.5                  | [S4 – S5]   |
| MoS <sub>2</sub>                  | bulk         | 0.2~1.7                    | -                       | 100 ~ 150                 | [S6]        |
| MoSe <sub>2.1</sub>               | bulk         | $8 \times 10^{-6}$         | $3 \times 10^{-6}$      | ~650                      | [S7]        |
| WSe <sub>2</sub>                  | bulk         | 0.001~0.19                 | -                       | 783 ~ 900                 | [S8 – S9]   |
| WS <sub>2</sub>                   | Thin film    | $10 \sim 1 \times 10^3$    | 9                       | 75~ 700.78                | [S10 – S12] |
| WS <sub>2-x</sub> Se <sub>x</sub> | Thin film    | 0.021 ~ 40                 | -                       | 300~945                   | [S13 – S14] |
| MoS <sub>2</sub>                  | Thin film    | ~786                       | $\sim 1 \times 10^{-4}$ | 115 ~ 742                 | This work   |

## References

- S1. M. Kayyalha, J. Maassen, M. Lundstrom, L. Shi and Y. P. Chen, *J. Appl. Phys.*, 2016, **120**, 134305.
- S2. M. Buscema, M. Barkelid, V. Zwiller, H. S. J. van der Zant, G. A. Steele and A. Castellanos-Gomez, *Nano Lett.*, 2013, **13**, 358-363.
- S3. J. Wu, H. Schmidt, K. K. Amara, X. Xu, G. Eda and B. Özyilmaz, *Nano Lett.*, 2014, **14**, 2730-2734.
- S4. X. Li, T. Wang, F. Jiang, J. Liu, P. Liu, G. Liu, J. Xu, C. Liu and Q. Jiang, *Journal of Alloys and Compounds*, 2019, **781**, 744-750.
- S5. T. Wang, C. Liu, J. Xu, Z. Zhu, E. Liu, Y. Hu, C. Li and F. Jiang, *Nanotechnology*, 2016, **27**, 285703.
- S6. S. Kong, T. Wu, W. Zhuang, P. Jiang and X. Bao, *The Journal of Physical Chemistry B*, 2018, **122**, 713-720.
- S7. L. Ruan, H. Zhao, D. Li, S. Jin, S. Li, L. Gu and J. Liang, *Journal of Electronic Materials*, 2016, **45**, 2926-2934.
- S8. W. T. Hicks, *Journal of The Electrochemical Society*, 1964, **111**, 1058.
- S9. Y. Liu, J. Liu, X. Tan, Y. Li, R. Liu, Y. Lin and C. Nan, *Journal of the American Ceramic Society*, 2017, **100**, 5528-5535.
- S10. J. Y. Oh, J. H. Lee, S. W. Han, S. S. Chae, E. J. Bae, Y. H. Kang, W. J. Choi, S. Y. Cho, J.-O. Lee, H. K. Baik and T. I. Lee, *Energ Environ Sci*, 2016, **9**, 1696-1705.
- S11. H. Kawai, M. Sugahara, R. Okada, Y. Maniwa, Y. Yomogida and K. Yanagi, *Applied Physics Express*, 2016, **10**, 015001.
- S12. J. H. Kim, S. Yu, S. W. Lee, S. Y. Lee, K. S. Kim, Y. A. Kim and C. M. Yang, *Crystals*, 2020, **10**, 140.
- S13. G. K. Solanki, D. N. Gujarathi, M. P. Deshpande, D. Lakshminarayana and M. K. Agarwal, *Crystal Research and Technology*, 2008, **43**, 179-185.
- S14. G. E. Yakovleva, A. I. Romanenko, A. S. Berdinsky, A. Y. Ledneva, V. A. Kuznetsov, M. K. Han, S. J. Kim and V. E. Fedorov, 2016.
